# Supplementary material for: NewN-(2-phenyl-4-oxo-1,3-thiazolidin-3-yl)-1,2-benzothiazole-3-carboxamides and acetamides as antimicrobial agents
Source: Royal Society of Chemistry journal article supplement (doi:10.1039/c7md00334j), 2017-01-01
Supplement: c7md00334j1.pdf [file c7md00334j1.pdf]

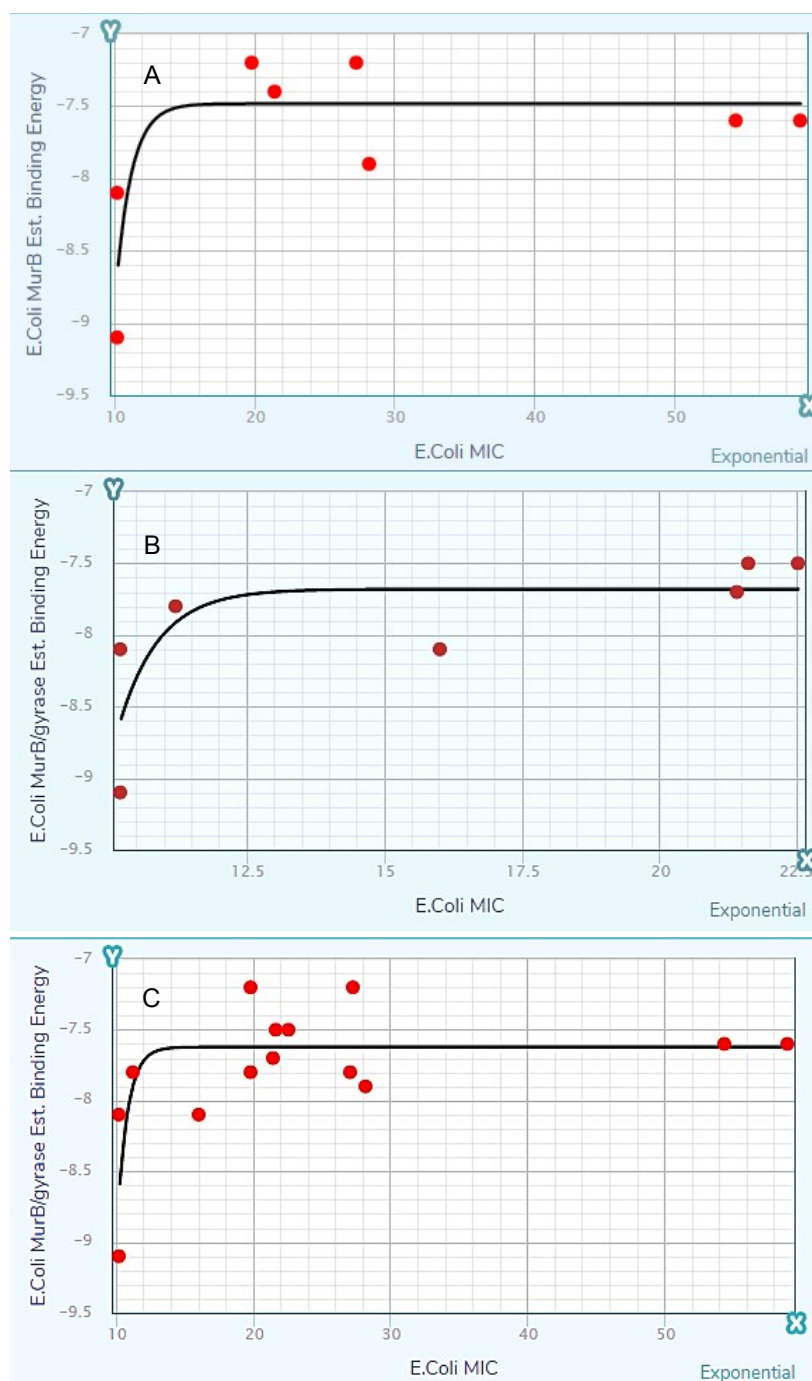

Figure S1. A. Best curve for the correlation of Estimated Binding Energy against *E. coli* MurB and *E. coli* MIC for the compounds with lower estimated Binding Energy to Mur B compared to gyrase.  $R^2=0.6829$ . B. Best curve for the correlation of the lowest Estimated Binding Energy against *E. coli* MurB or gyrase (the lowest one) and *E. coli* MIC, for compounds with  $\text{clogP} < 4,000$ .  $R^2=0.5934$ . C. best curve for the correlation of the lowest Estimated Binding Energy against *E. coli* MurB or gyrase with *E. coli* MIC, for all compound with no  $\text{clogP}$  restrictions.  $R^2=0.5571$ ,  $p=0.02529$ .

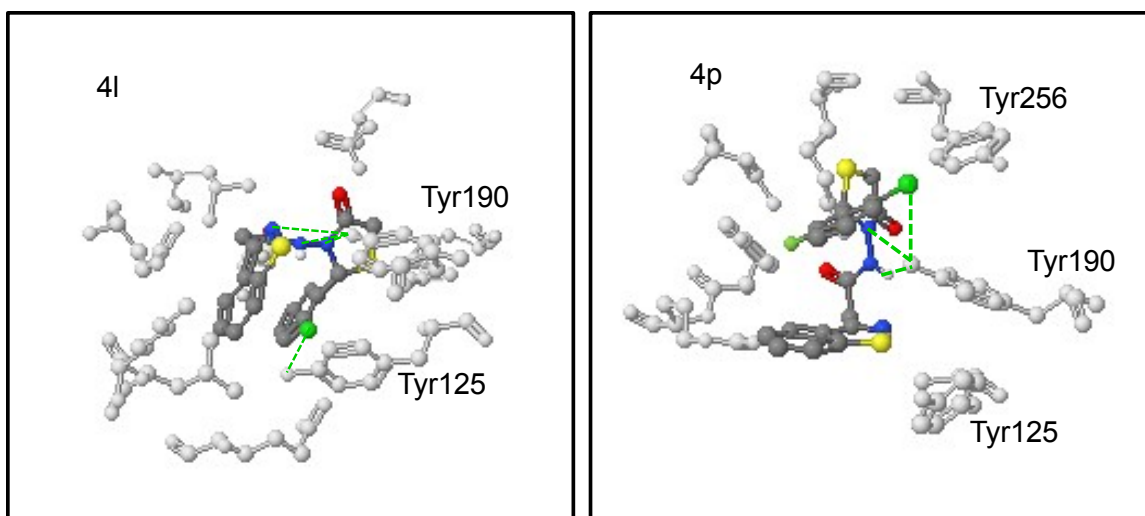

Figure S2. Docking of compounds 4l and 4p in the active site of *E. coli* MurB.

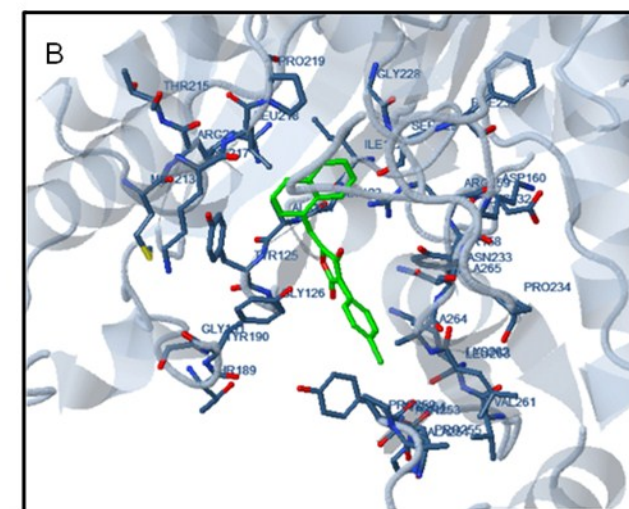

Figure S3. Docking of the inhibitor (5Z)-3-(4-chlorophenyl)-4-hydroxy-5-(1-naphthylmethylene)furan-2(5H)-one, in the active site of *E. coli* MurB.

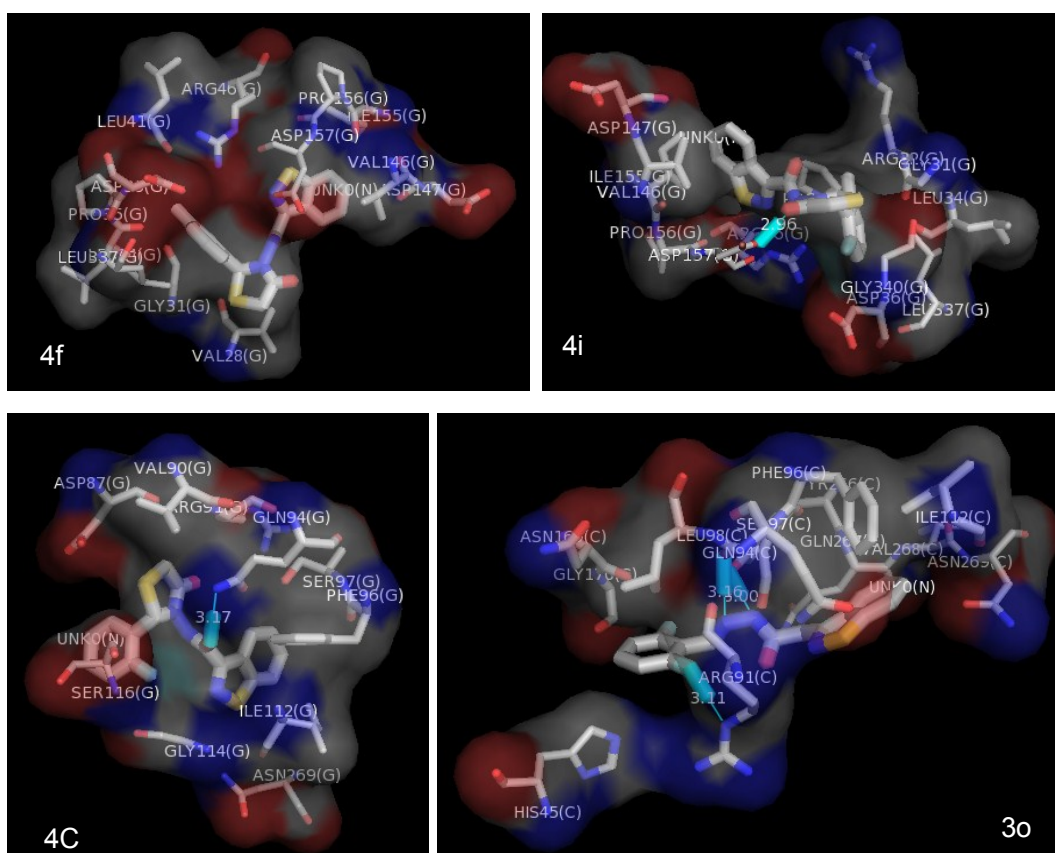

Figure S4. Docking of the compounds 4f, 4i, 4c and 3o in E.Coli gyrase.

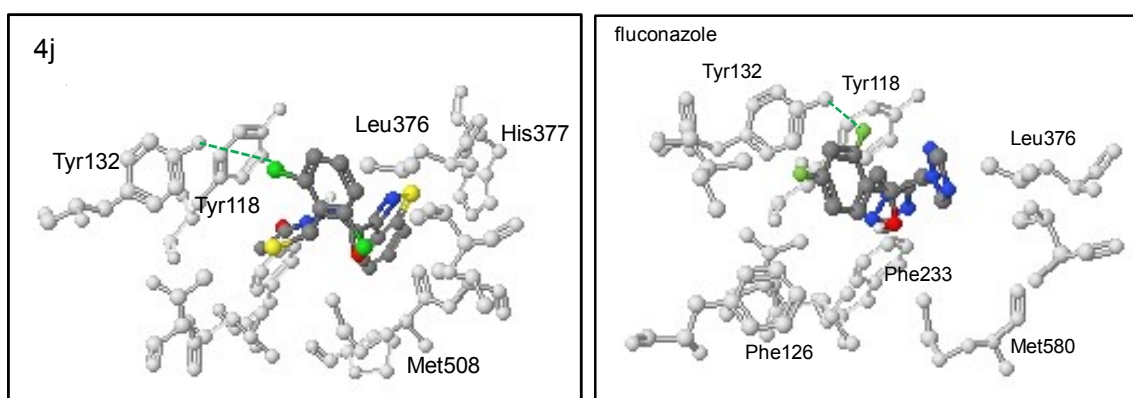

Figure S5. Docking of compound 4j and fluconazole to the active site of *Candida Alpicans* 14a-lanosterol demethylase (ERG11) (PBD ID:2v2z)
